# Supplementary material for: Tailorable surface sulfur chemistry of mesoporous Ni3S2 particles for efficient oxygen evolution
Source: Royal Society of Chemistry journal article supplement (doi:10.1039/c9ta00646j), 2019-01-01
Supplement: c9ta00646j1.pdf [file c9ta00646j1.pdf]

## **Supporting Information**

### **Tailorable Surface Sulfur Chemistry of Mesoporous Ni<sub>3</sub>S<sub>2</sub> Particles for Efficient Oxygen Evolution**

Haoxuan Zhang,<sup>a</sup> Hao Jiang,<sup>\*a</sup> Yanjie Hu,<sup>a</sup> Yuhang Li,<sup>a</sup> Qiucheng Xu,<sup>a</sup> Saha Petr,<sup>b</sup>

Chunzhong Li <sup>\*a</sup>

<sup>a</sup> Key Laboratory for Ultrafine Materials of Ministry of Education, Shanghai Engineering Research Center of Hierarchical Nanomaterials, School of Materials Science and Engineering, East China University of Science and Technology, Shanghai 200237, China

<sup>b</sup> Centre of Polymer Systems, University Institute, Tomas Bata University in Zlin, Trida T. Bati 5678, 760 01 Zlin, Czech Republic

Email: [jianghao@ecust.edu.cn](mailto:jianghao@ecust.edu.cn) (Prof. H. Jiang) and [czli@ecust.edu.cn](mailto:czli@ecust.edu.cn) (Prof. C. Z. Li)

## **Part I: Experimental Section**

### **1.1 Synthesis of the sulfur-engineered Ni<sub>3</sub>S<sub>2</sub> electrocatalyst**

Prior to use, nickel foams (0.5 cm × 0.6 cm × 0.3 mm) were immersed in 3 M HCl for 15 min to clean the surface. The sulfur-engineered Ni<sub>3</sub>S<sub>2</sub> electrocatalyst was prepared by a low temperature hydrothermal method. Typically, 0.3 g of L-Cysteine was put into 20 mL of deionized water with strong stirring for 15 min to form a homogenous solution. Subsequently, the solution was then transferred in a 25 mL Teflon-lined autoclave. And then, the nickel foam was put into the autoclave, which was sealed and heated to 160 °C for 2 h. After cooled down to room temperature, the sample was washed with deionized water and absolute ethanol for three times. Finally, the sulfur-engineered Ni<sub>3</sub>S<sub>2</sub> electrocatalyst was obtained after dried at 60 °C for 6 h in vacuum. For comparison, the pristine Ni<sub>3</sub>S<sub>2</sub> and O-Ni<sub>3</sub>S<sub>2</sub> electrocatalysts were prepared by the similar strategy except for finely adjusting reaction temperature to 165 °C and 170 °C, respectively. The mass loadings of the S-Ni<sub>3</sub>S<sub>2</sub>, Ni<sub>3</sub>S<sub>2</sub> and O-Ni<sub>3</sub>S<sub>2</sub> are 11.2, 19.3 and 9.0 mg cm<sup>-2</sup>, respectively.

### **1.2 Synthesis of the RuO<sub>2</sub> electrocatalyst**

The RuO<sub>2</sub> powder was supported on the Ni foam to test OER performances. Typically, 5 mg of RuO<sub>2</sub> powder (Adamas Reagent Co., Ltd.), 950 mL of isopropanol and 50 mL of 5 wt% Nafion solution were mixed by 30 min sonication to obtain well-dispersed ink. After that, the resulting ink was dropped onto the Ni foam with a mass loading of 11.2 mg cm<sup>-2</sup>.

### **1.3 Characterization**

The scanning electron microscope (SEM) images were taken from Hitachi, S-4800 at an accelerating voltage of 15.0 kV. The transmission electron microscope (TEM)

images were taken from JEOL, JEM-2100F with an X-ray energy-dispersive spectrometer (EDS) at an accelerating voltage of 200.0 kV. The X-ray powder diffraction (XRD) patterns were recorded on a Rigaku D/Max 2550 diffractometer with Cu K $\alpha$  radiation at a scan rate of 1° min<sup>-1</sup>. X-ray photoelectron spectroscopy (XPS) spectra were recorded by an ESCALAB 250Xi X-ray photoelectron spectrometer at pass energy of 40 eV with an Al K $\alpha$  X-ray source. Elemental analysis of sulfur content was performed on an Agilent 7700 Inductively coupled plasma (ICP) mass spectrometer. The samples were directly conducted by the scanning electron microscopy and X-ray powder diffractometer, were dispersed in absolute ethanol for transmission electron microscopy analysis, and were grinded to powder for X-ray photoelectron spectrometer measurement.

#### **1.4 Electrochemical Measurements**

The OER performances were measured by a CHI660E electrochemical workstation (Chenhua, Shanghai). All electrochemical measurements were performed in a standard three-electrode system comprising of a saturated Ag/AgCl reference electrode, a graphite counter electrode and a 30 mL 1.0 M KOH electrolyte. The electrocatalysts supported on nickel foam were directly applied as working electrode. The measured potential was calibrated to reversible hydrogen electrode (RHE) potential according to the following equation:

$$E_{RHE} = E_{Ag/AgCl} + 0.1976 + 0.0591 \times pH$$

Before OER test, O<sub>2</sub>-saturated condition was achieved by purging with O<sub>2</sub> for 30 min, which was kept during whole test process. Linear sweep voltammetry technique was applied to

record OER polarization curves at a sweep rate of 1 mV s<sup>-1</sup>. Chronopotentiometry was applied to measure the stability of electrocatalysts at constant current densities of 10, 50 and 100 mA cm<sup>-2</sup>. Electrochemical impedance spectroscopy (EIS) was performed at 1.56 V vs. RHE in a wide frequency ranging (10 kHz - 100 mHz) with a current voltage amplitude of 5 mV. The presented data was compensated with 95% *iR* correction, and ohmic resistance was estimated from the EIS results at a phase angle of 0° in high frequency. Electrochemically active surface area (ECSA) was calculated by the following equation:

$$ECSA = \frac{C_{DL}}{C_s}$$

where  $C_{DL}$  is the double layer capacitance,  $C_s$  is the specific capacitance. The specific capacitance of Ni is 25 μF cm<sup>-2</sup> in alkaline media. Turnover frequency (TOF) was estimated from the following equation:

$$TOF = \frac{J \times A}{2 \times F \times n}$$

where  $J$  is the current density in the OER polarization curves,  $A$  is the geometric area of electrode,  $F$  is the Faraday constant (C mol<sup>-1</sup>), and  $n$  is the mole number of active sites on the electrode.

## Part II: Supporting Figures

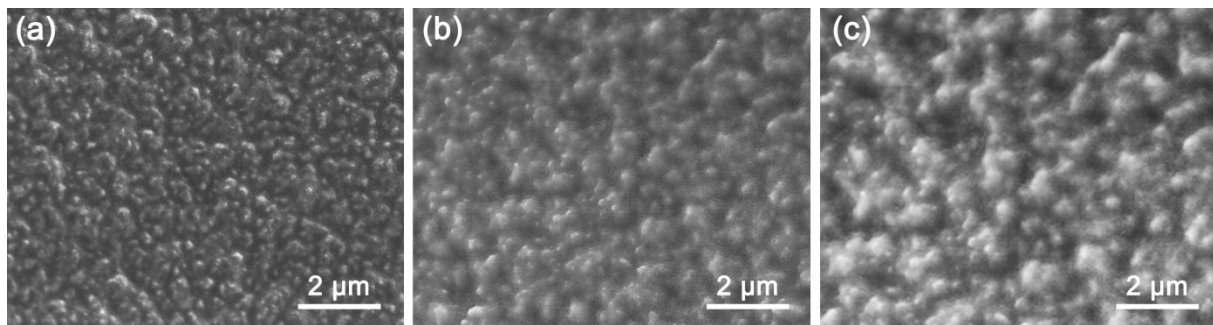

**Fig. S1** SEM images of (a) the S-Ni<sub>3</sub>S<sub>2</sub>, (b) the pristine Ni<sub>3</sub>S<sub>2</sub> and (c) the O-Ni<sub>3</sub>S<sub>2</sub> electrocatalysts.

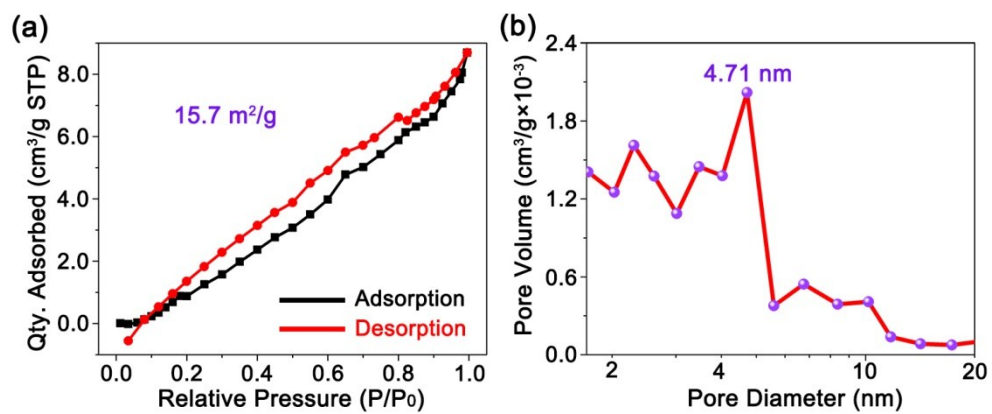

**Fig. S2** (a) Nitrogen adsorption-desorption isotherms and (b) the corresponding pore-size distribution curve of S-Ni<sub>3</sub>S<sub>2</sub>.

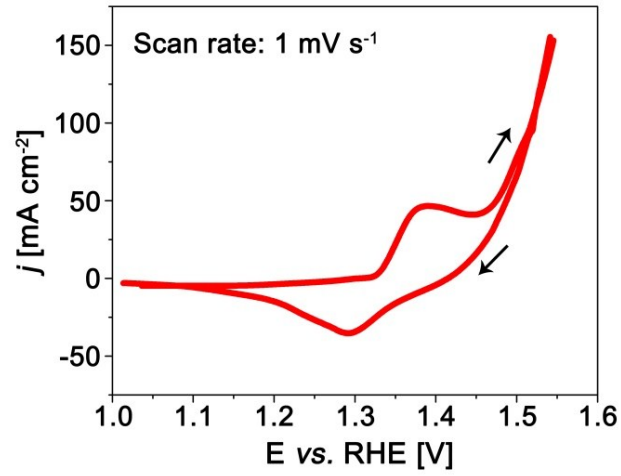

Fig. S3 Cyclic voltammetric curve of the S-Ni<sub>3</sub>S<sub>2</sub> electrocatalyst.

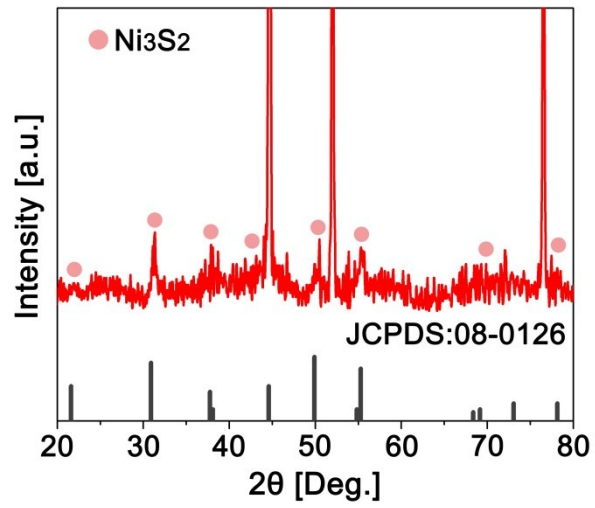

Fig. S4 XRD pattern of the S-Ni<sub>3</sub>S<sub>2</sub> electrocatalyst after OER.

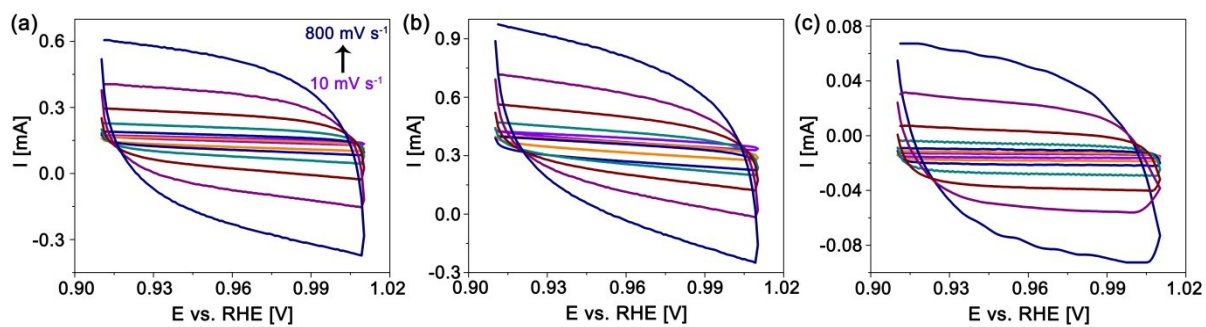

**Fig. S5** Cyclic voltammogram curves of (a) the S-Ni<sub>3</sub>S<sub>2</sub>, (b) the pristine Ni<sub>3</sub>S<sub>2</sub> and (c) the O-Ni<sub>3</sub>S<sub>2</sub> electrocatalysts in the non-faradic potential range at different sweep rates.

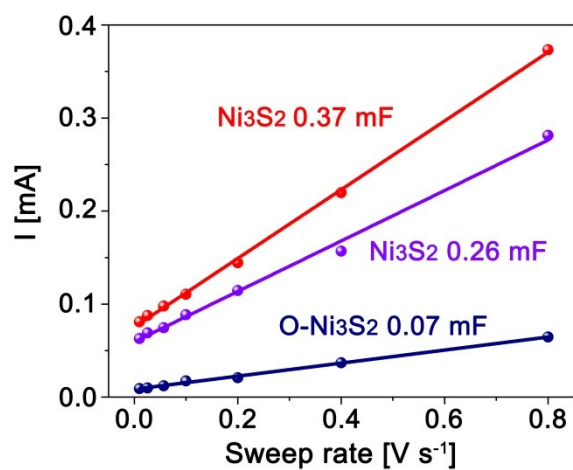

**Fig. S6** Capacitive currents as a function of sweep rate of the S-Ni<sub>3</sub>S<sub>2</sub>, the pristine Ni<sub>3</sub>S<sub>2</sub> and the O-Ni<sub>3</sub>S<sub>2</sub> electrocatalysts measured at 0.96 V vs. RHE. The double-layer capacitances are calculated from the slope of the linear fitting to the data.

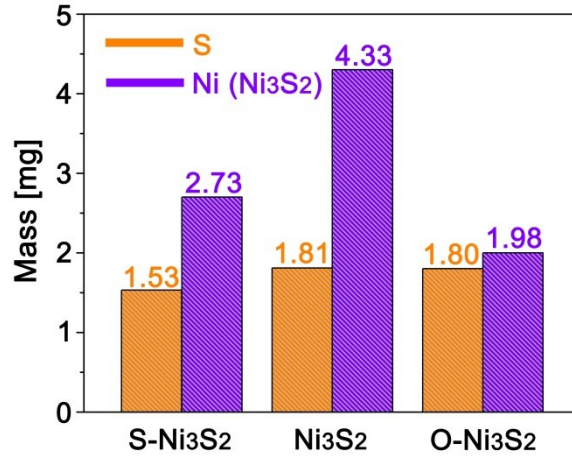

**Fig. S7** Total S content and the corresponding Ni content in the S-Ni<sub>3</sub>S<sub>2</sub>, the pristine Ni<sub>3</sub>S<sub>2</sub> and the O-Ni<sub>3</sub>S<sub>2</sub> electrocatalysts. The total S content in S-Ni<sub>3</sub>S<sub>2</sub>, Ni<sub>3</sub>S<sub>2</sub> and O-Ni<sub>3</sub>S<sub>2</sub> samples are based on ICP-MS results and the percentages of S-Ni are estimated according to the peak areas of XPS S<sub>2p</sub> spectra. As a result, the Ni content in Ni<sub>3</sub>S<sub>2</sub> is calculated as follows:

$$m_S = m_{total} \times wt_{S-Ni} \quad (1)$$

$$m_{Ni} = \frac{m_S}{M_S} \times \frac{3}{2} \times M_{Ni} \quad (2)$$

where  $m_S$  is the S content in Ni<sub>3</sub>S<sub>2</sub>,  $m_{total}$  is the total S content based on ICP-MS results,  $wt_{S-Ni}$  is the percentage of S-Ni according to the peak areas of XPS S<sub>2p</sub> spectra,  $m_{Ni}$  is the Ni content in Ni<sub>3</sub>S<sub>2</sub>,  $M_S$  and  $M_{Ni}$  are the molar mass of S and Ni, respectively.



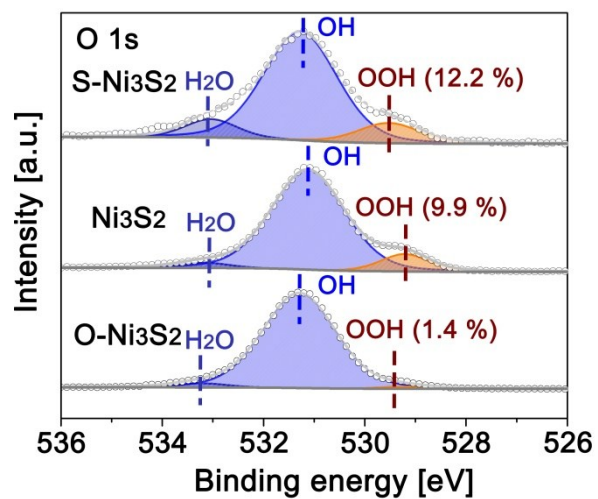

**Fig. S8** XPS spectra of O 1s region after OER of the S-Ni<sub>3</sub>S<sub>2</sub>, the pristine Ni<sub>3</sub>S<sub>2</sub> and the O-Ni<sub>3</sub>S<sub>2</sub> electrocatalysts.

### Part III: Supporting Table

**Table S1** Comparison of OER performances of various Ni<sub>3</sub>S<sub>2</sub> electrocatalysts.

| Catalyst                                                         | Measurement                  | Loading<br>(mg cm <sup>-2</sup> ) | J<br>(mA cm <sup>-2</sup> ) | $\eta$<br>(mV)     | Tafel slope<br>(mV dec <sup>-1</sup> ) | Ref.                 |
|------------------------------------------------------------------|------------------------------|-----------------------------------|-----------------------------|--------------------|----------------------------------------|----------------------|
| Ni <sub>3</sub> S <sub>2</sub> nanorods                          | Ni foam<br>1.0 M KOH         | 37.0                              | 10<br>100                   | 237<br>> 400       | 159                                    | 10                   |
| Fe-doped Ni <sub>3</sub> S <sub>2</sub><br>nanosheet array       | Ni foam<br>1.0 M KOH         | 6.0                               | 10                          | 214                | 42                                     | 11                   |
| Ni <sub>3</sub> S <sub>2</sub> -NGQDs                            | Ni foam<br>1.0 M KOH         | 8.0                               | 10<br>100                   | 216<br>390         | 95                                     | 12                   |
| NCDs/Ni <sub>3</sub> S <sub>2</sub>                              | Ni foam<br>1.0 M KOH         | 4.2                               | 10<br>100                   | 270                | 67                                     | 13                   |
| 3D hierarchical<br>Ni <sub>3</sub> S <sub>2</sub> superstructure | Ni foam<br>1.0 M KOH         | \                                 | 100                         | 320                | 59                                     | 15                   |
| Ni <sub>3</sub> S <sub>2</sub> nanosheet<br>arrays               | Ni foam<br>1.0 M KOH         | 1.6                               | 10                          | 245                | \                                      | 16                   |
| N-Ni <sub>3</sub> S <sub>2</sub><br>electrocatalys               | Ni foam<br>1.0 M KOH         | \                                 | 100                         | 330                | 70                                     | 22                   |
| Zn-doped Ni <sub>3</sub> S <sub>2</sub><br>nanosheet array       | Ni foam<br>1.0 M KOH         | 2.3                               | 100                         | 330                | 74                                     | 24                   |
| <b>Sulfur-engineered<br/>Ni<sub>3</sub>S<sub>2</sub></b>         | <b>Ni foam<br/>1.0 M KOH</b> | <b>11.2</b>                       | <b>10<br/>100</b>           | <b>213<br/>286</b> | <b>45</b>                              | <b>This<br/>work</b> |
